# Supplementary material for: Co-modified Fe2O3–ZrO2 for catalyzing propane and CO2 reaction to propylene
Source: Royal Society of Chemistry journal article supplement (doi:10.1039/d4nj01191k), 2024-01-01
Supplement: d4nj01191k1.pdf [file d4nj01191k1.pdf]

## Supplementary Information

### Characterization procedures

*Phase measurement* was carried out on an X-ray diffractometer (Rigaku D/MAX 2200PC) using Ni-filtered Cu K $\alpha$  radiation at 40 kV and 30 mA. *UV-Vis DRS* was recorded at the wavelength range of 200-900 nm on a Shimadzu UV-2700i spectrophotometer using solid BaSO<sub>4</sub> powder for background correction. *Textural parameter* measurements were carried out on a surface analyzer (JW-BK132F) using N<sub>2</sub> physicoadsorption. A sample of 200 mg was degassed at 250 °C for 4 h before measurement. The specific surface area was obtained using the Brunauer-Emmett-Teller (BET) model. Pore volume and pore distribution were obtained using the Barrett-Joyner-Halenda (BJH) model. *Micro morphology* was observed on a FESEM (ZEISS Gemini 300 microscope) at 30 kV and a TEM (FEI Talos F200X) at 200 kV. *XPS* was performed on a Thermo Scientific K-Alpha spectrometer using an Al K $\alpha$  X-ray radiation source. The base pressure of the chamber was less than  $5 \times 10^{-8}$  Pa. The binding energy (B.E.) was calibrated to adventitious carbon using the C1s peak at 284.8 eV. *NH<sub>3</sub>-TPD* was performed on a TP-5080 adsorption instrument. A sample of 50 mg was pretreated in a He flow (30 mL·min<sup>-1</sup>) at 550 °C for 1 h and then cooled down to ambient temperature. Then NH<sub>3</sub> was adsorbed at 100 °C for 30 min followed by purge in the He flow for 0.5 h. The desorption of NH<sub>3</sub> was recorded using TCD as the temperature was raised at 10 °C·min<sup>-1</sup> from ambient temperature to 600 °C. *CO<sub>2</sub>/C<sub>3</sub>H<sub>8</sub>-TPD* was carried out on a chemisorption instrument (Micromeritics AutoChem II 2920). A sample of 50 mg was placed into a U-shaped quartz tube and pretreated at 350 °C for 1 h in a He flow (30 mL·min<sup>-1</sup>). Then the sample was cooled down to 50 °C and adsorbed CO<sub>2</sub>/C<sub>3</sub>H<sub>8</sub> (30 mL·min<sup>-1</sup>) for 30 min. Next, the sample was purged by the He flow for 1 h. Subsequently, as the temperature rose to 800 °C at a rate of 10 °C·min<sup>-1</sup>, the desorption amount of CO<sub>2</sub>/C<sub>3</sub>H<sub>8</sub> was recorded using TCD. For *H<sub>2</sub>-TPR*, a sample of 50 mg was loaded into, followed by pretreatment at 300 °C for 1 h, and cooled down to ambient temperature in the He flow. Then, as the sample was heated at 10 °C·min<sup>-1</sup> to 800 °C in a 10% H<sub>2</sub>/Ar flow (30 mL·min<sup>-1</sup>), the H<sub>2</sub> consumed was recorded. *TG analysis* of the used catalyst samples was carried out on a thermogravimetric analyzer (NETZSCH STA 449). A sample of 20 mg was heated at 20 °C·min<sup>-1</sup> from ambient temperature to 800 °C in an air flow (30 mL·min<sup>-1</sup>), and the weight was synchronously recorded. *Raman spectra* were recorded on a HORIBA Scientific LabRAM HR Evolution spectrophotometer equipped with a solid state laser (532 nm wave-length, 17 mW capacity) as the

excitation source and a 5x objective lens, at ambient temperature in the wavenumber range of 100–2000  $\text{cm}^{-1}$ . *In-situ DRIFTS analysis* was carried out on a Bruker Tensor II spectrometer equipped with a diffuse reflectance cell. The catalyst sample was pretreated at 300 °C in an Ar flow ( $20 \text{ mL}\cdot\text{min}^{-1}$ ) for 2 h, and cooled down to 30 °C. The background was recorded. Then  $\text{C}_3\text{H}_8\text{-CO}_2$  (1/1,  $20 \text{ mL}\cdot\text{min}^{-1}$ ) was switched into. As the cell was heated at  $10 \text{ }^\circ\text{C}\cdot\text{min}^{-1}$ , the spectra at the set temperature interval were collected.

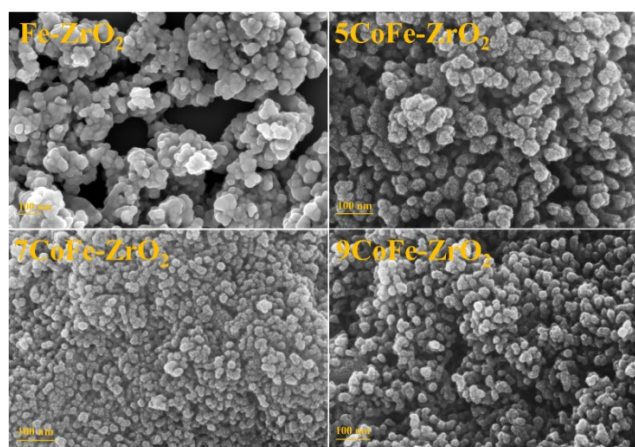

**Fig. S1** SEM images of fresh catalysts.

**Table S1** Textural parameters of fresh catalysts

| Catalysts              | $A_{\text{BET}}$<br>( $\text{m}^2\cdot\text{g}^{-1}$ ) | Cumulative pore<br>volume( $\text{cm}^3\cdot\text{g}^{-1}$ ) | Average pore<br>diameter(nm) |
|------------------------|--------------------------------------------------------|--------------------------------------------------------------|------------------------------|
| Fe-ZrO <sub>2</sub>    | 63.9                                                   | 0.30                                                         | 10.9                         |
| 3CoFe-ZrO <sub>2</sub> | 87.6                                                   | 0.26                                                         | 8.3                          |
| 5CoFe-ZrO <sub>2</sub> | 87.9                                                   | 0.25                                                         | 9.4                          |
| 7CoFe-ZrO <sub>2</sub> | 88.3                                                   | 0.25                                                         | 8.7                          |
| 9CoFe-ZrO <sub>2</sub> | 89.6                                                   | 0.24                                                         | 8.4                          |

**Table S2** Initial catalytic activity of nCoFe-ZrO<sub>2</sub> for propane and CO<sub>2</sub> reaction

| Catalysts              | Conv. (%)                     |                 | Hydrocarbon sel. (%)          |                 |                               |                               | Yield (%)                     |      |                | Carbon      |
|------------------------|-------------------------------|-----------------|-------------------------------|-----------------|-------------------------------|-------------------------------|-------------------------------|------|----------------|-------------|
|                        | C <sub>3</sub> H <sub>8</sub> | CO <sub>2</sub> | C <sub>3</sub> H <sub>6</sub> | CH <sub>4</sub> | C <sub>2</sub> H <sub>4</sub> | C <sub>2</sub> H <sub>6</sub> | C <sub>3</sub> H <sub>6</sub> | CO   | H <sub>2</sub> | balance (%) |
| Co-ZrO <sub>2</sub>    | 77.1                          | 57.8            | 0                             | 100             | 0                             | 0                             | 0                             | 54.5 | 41.8           | 65.0        |
| 9CoFe-ZrO <sub>2</sub> | 48.1                          | 38.2            | 75.6                          | 18.7            | 1.34                          | 0.64                          | 36.4                          | 31.7 | 6.87           | 95.7        |
| 7CoFe-ZrO <sub>2</sub> | 47.6                          | 37.4            | 80.1                          | 15.2            | 1.82                          | 0.59                          | 38.1                          | 29.5 | 6.94           | 97.1        |
| 5CoFe-ZrO <sub>2</sub> | 45.8                          | 36.6            | 81.2                          | 12.1            | 2.34                          | 0.56                          | 37.2                          | 26.1 | 6.45           | 95.8        |
| 3CoFe-ZrO <sub>2</sub> | 45.1                          | 35.9            | 82.7                          | 10.8            | 2.11                          | 0.51                          | 37.3                          | 25.6 | 5.85           | 94.4        |
| Fe-ZrO <sub>2</sub>    | 39.9                          | 28.2            | 83.7                          | 7.55            | 1.61                          | 0.42                          | 33.1                          | 23.5 | 5.15           | 90.6        |

W/F=12.5 g·h·mol<sup>-1</sup>, 550 °C, 0.1 MPa, TOS=10 min.

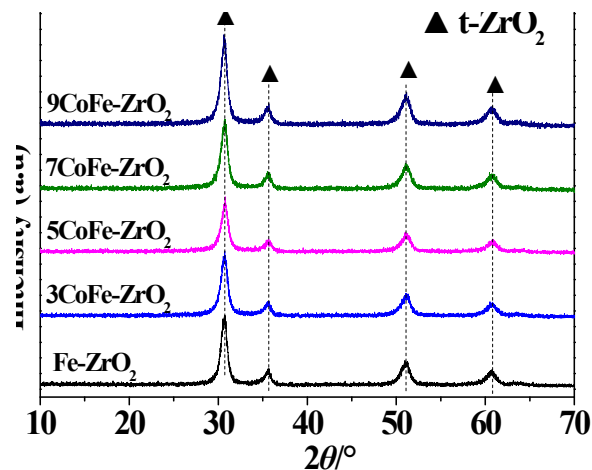

Fig. S2 XRD patterns of fresh catalysts.

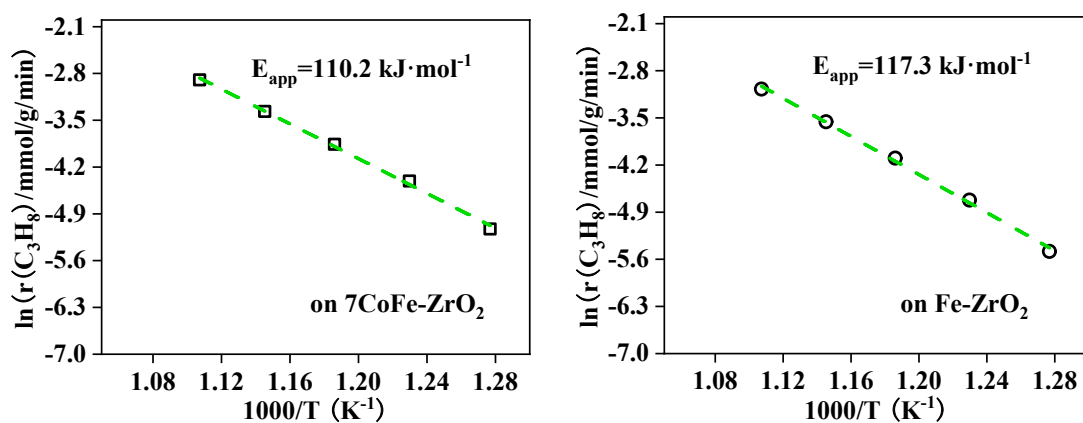

Fig. S3 Kinetics studies for PDH-CO<sub>2</sub>.

$F_0$ : inlet molar flow rate of  $C_3H_8$ ,  $X$ :  $C_3H_8$  conversion, and  $W_{cat}$ : cat. weight (0.5 g).

$W/F=5.3 \text{ g} \cdot \text{h} \cdot \text{mol}^{-1}$  (To avoid possible propane pyrolysis).

$T=510, 540, 570, 600, \text{ and } 630 \text{ } ^\circ\text{C}$ , 0.1 MPa.

$$r(C_3H_8)(\text{mmol/g/min}) = \frac{F_0 \cdot X(C_3H_8)}{W_{cat}}$$

**Table S3** Electron binding energy of Fe  $2p_{3/2}$  for the used catalysts

| Catalysts              | B. E. (eV)       |                  |                                     |
|------------------------|------------------|------------------|-------------------------------------|
|                        | Fe <sup>2+</sup> | Fe <sup>3+</sup> | Fe <sup>2+</sup> / Fe <sup>3+</sup> |
| 7Co-FeZrO <sub>2</sub> | 711.4            | 713.5            | 0.52                                |
| Fe-ZrO <sub>2</sub>    | 711.2            | 713.5            | 0.47                                |

**Table S4** Surface element composition of fresh catalysts based on XPS

| Catalysts              | Fe<br>(wt.%) | Zr<br>(wt.%) | O<br>(wt.%) | Co<br>(wt.%) | Co/(Fe <sub>2</sub> O <sub>3</sub> +ZrO <sub>2</sub> )<br>(mass ratio) | Co/(Fe <sub>2</sub> O <sub>3</sub> +ZrO <sub>2</sub> )<br>(nominal mass ratio) |
|------------------------|--------------|--------------|-------------|--------------|------------------------------------------------------------------------|--------------------------------------------------------------------------------|
| Fe-ZrO <sub>2</sub>    | 8.20         | 22.10        | 69.70       | /            | /                                                                      | /                                                                              |
| 5CoFe-ZrO <sub>2</sub> | 6.63         | 18.48        | 72.74       | 2.15         | 4.87                                                                   | 5.0                                                                            |
| 7CoFe-ZrO <sub>2</sub> | 5.69         | 17.39        | 74.23       | 2.69         | 6.84                                                                   | 7.0                                                                            |
| 9CoFe-ZrO <sub>2</sub> | 4.83         | 16.59        | 75.52       | 3.06         | 8.91                                                                   | 9.0                                                                            |

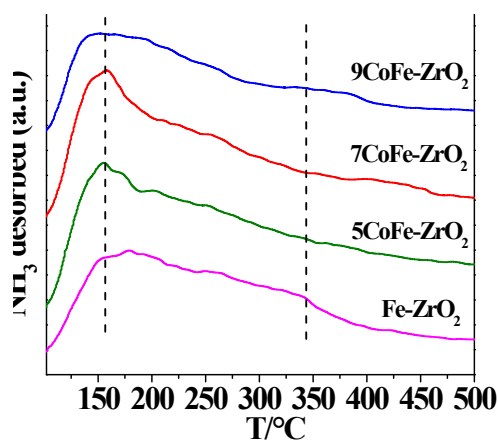**Fig. S4** NH<sub>3</sub>-TPD profiles of fresh catalysts.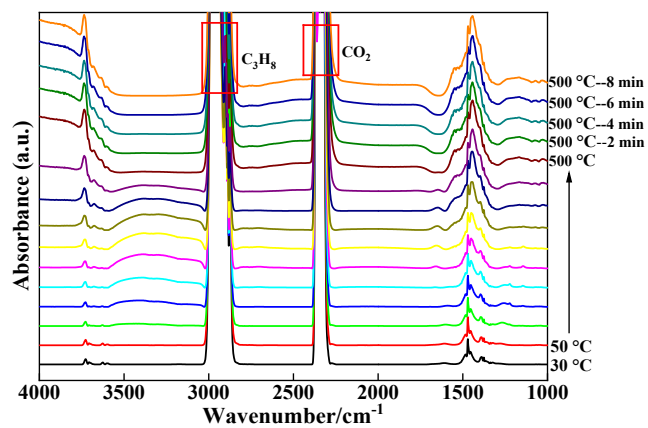**Fig. S5** *In situ* DRIFT spectra for propane and CO<sub>2</sub> reaction on 7CoFe-ZrO<sub>2</sub>.

**Table S5** *In situ* DRIFT absorption assignments

| Bands     | Species                                                                | Modes                       | Ref.       |
|-----------|------------------------------------------------------------------------|-----------------------------|------------|
| 3734      | M(Fe/Zr/Co)-OH                                                         | $\nu$ (O-H)                 | S1, S2     |
| 3700      | M(Fe/Zr/Co)-OH                                                         | $\nu$ (O-H)                 | S3, S4     |
| 3679      | M(Fe/Zr/Co)-OH                                                         | $\nu$ (O-H)                 | S1, S2, S4 |
| 3631      | triply bridged-OH<br>(Zr-OH-Fe)                                        | $\nu$ (O-H)                 | S5         |
| 3028-2814 | gaseous C <sub>3</sub> H <sub>8</sub>                                  | $\nu$ (C-H)                 | S6         |
| 2400-2230 | gaseous or *CO <sub>2</sub>                                            | $\nu$ (C=O)                 | S7         |
| 1650      | *HCO <sub>3</sub>                                                      | $\nu$ (COO)                 | S8         |
| 1546      | *OOCH                                                                  | $\nu$ (COO)                 | S9         |
| 1530      | *OOCCH <sub>3</sub>                                                    | $\nu$ (COO)                 | S10        |
| 1469      | methylene in C <sub>3</sub> H <sub>8</sub>                             | $\delta$ (CH <sub>2</sub> ) | S6, S11    |
| 1453      | methyl in C <sub>3</sub> H <sub>8</sub> /C <sub>3</sub> H <sub>6</sub> | $\delta$ (CH <sub>3</sub> ) | S11        |
| 1443      | methyl in C <sub>3</sub> H <sub>6</sub>                                | $\delta$ (CH <sub>3</sub> ) | S11        |
| 1394      | *CO <sub>3</sub>                                                       | $\nu$ (C=O)                 | S8         |
| 1375      | methyl in C <sub>3</sub> H <sub>8</sub> /C <sub>3</sub> H <sub>6</sub> | $\delta$ (CH <sub>3</sub> ) | S6         |
| 1070      | *OCH <sub>3</sub>                                                      | $\nu$ (CO)                  | S12        |
| 1030      | *CH <sub>3</sub> OH                                                    | $\nu$ (CO)                  | S12        |

**References**

- S1 K. Wang, W. Gao, F. Chen, G. Liu, J. Wu, N. Liu, Y. Kawabata, X. Guo, Y. He, P. Zhang, G. Yang and N. Tsubaki, *Appl. Catal. B: Environ.*, 2022, **301**, 120822.
- S2 J. Liu, X. Li, Q. Zhao, J. Ke, H. Xiao, X. Lv, S. Liu, M. Tadé and S. Wang, *Appl. Catal. B: Environ.*, 2017, **200**, 297–308.

- S3 Z. Zhang, H. Xia, Q. Dai and X. Wang, *Appl. Catal. A: Gen.*, 2018, **557**, 108-118.
- S4 L. Francke, E. Durand, A. Demourgues, A. Vimont, M. Daturic and A. Tressaud, *J. Mater. Chem.*, 2003, **13**, 2330–2340.
- S5 B. S. Klose, F. C. Jentoft and R. Schlögl, *J. Catal.*, 2005, **233**, 68–80.
- S6 S. Song, K. Yang, P. Zhang, Z. Wu, J. Li, H. Su, S. Dai, C. Xu, Z. Li, J. Liu and W. Song, *ACS Catal.*, 2022, **12**, 5997–6006.
- S7 L. P. L. Gonçalves, J. Mielby, O. S. G. P. Soares, J. P. S. Sousa, D. Y. Petrovykh, O. I. Lebedev, M. F. R. Pereira, S. Kegnaes and Y. V. Kolen'ko, *Appl. Catal., B: Environ.*, 2022, **312**, 121376.
- S8 P. J. Jodłowski, R. J. Jędrzejczyk, D. Chlebda, M. Gierada and J. Łojewska, *J. Catal.*, 2017, **350**, 1–12.
- S9 L. Schumacher and C. Hess, *J. Catal.*, 2021, **398**, 29–43.
- S10 S. M. K. Airaksinen, M. A. Bañares and A. O. I. Krause, *J. Catal.*, 2005, **230**, 507–513.
- S11 Y. Qu, T. Zhao, H. Zhao, Z. Zhang and Z. Hao, *Appl. Surf. Sci.*, 2022, **578**, 152067.
- S12 Z. Skoufa, E. Heracleous and A. A. Lemonidou, *J. Catal.*, 2015, **322**, 118–129.
